# Supplementary material for: Novel Au nanorod/Cu2O composite nanoparticles for a high-performance supercapacitor
Source: Royal Society of Chemistry journal article supplement (doi:10.1039/d2ra00812b), 2022-01-01
Supplement: d2ra00812b1.pdf [file d2ra00812b1.pdf]

## Supporting Information

### Novel Au nanorod/Cu<sub>2</sub>O composite nanoparticle for high-performance supercapacitor

Hansa Mahajan and Seongjae Cho

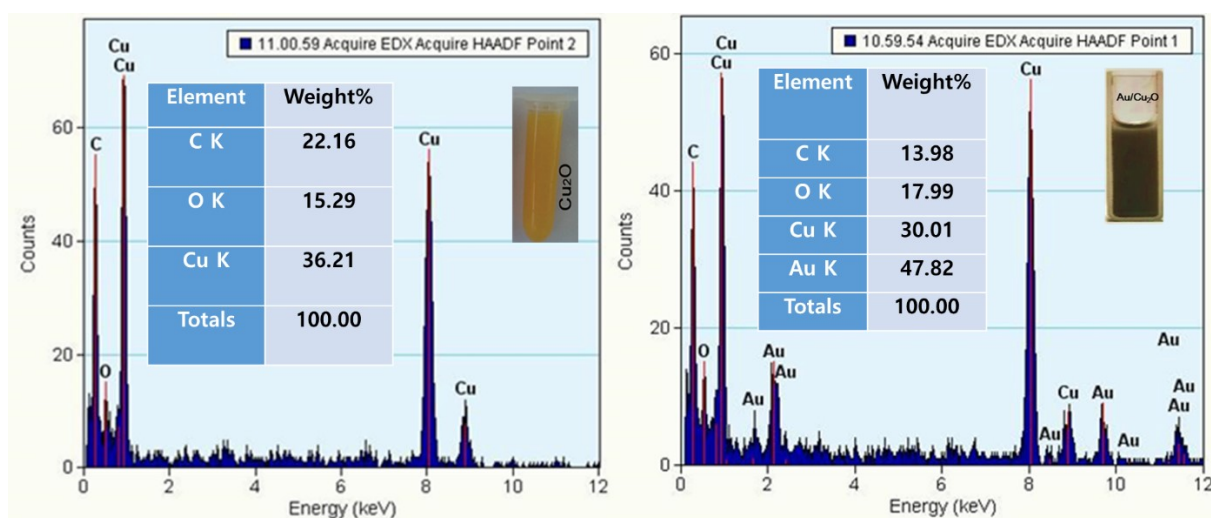

**Figure S1.** EDX analyses of (i) Cu<sub>2</sub>O NC and (ii) Au/Cu<sub>2</sub>O composite.

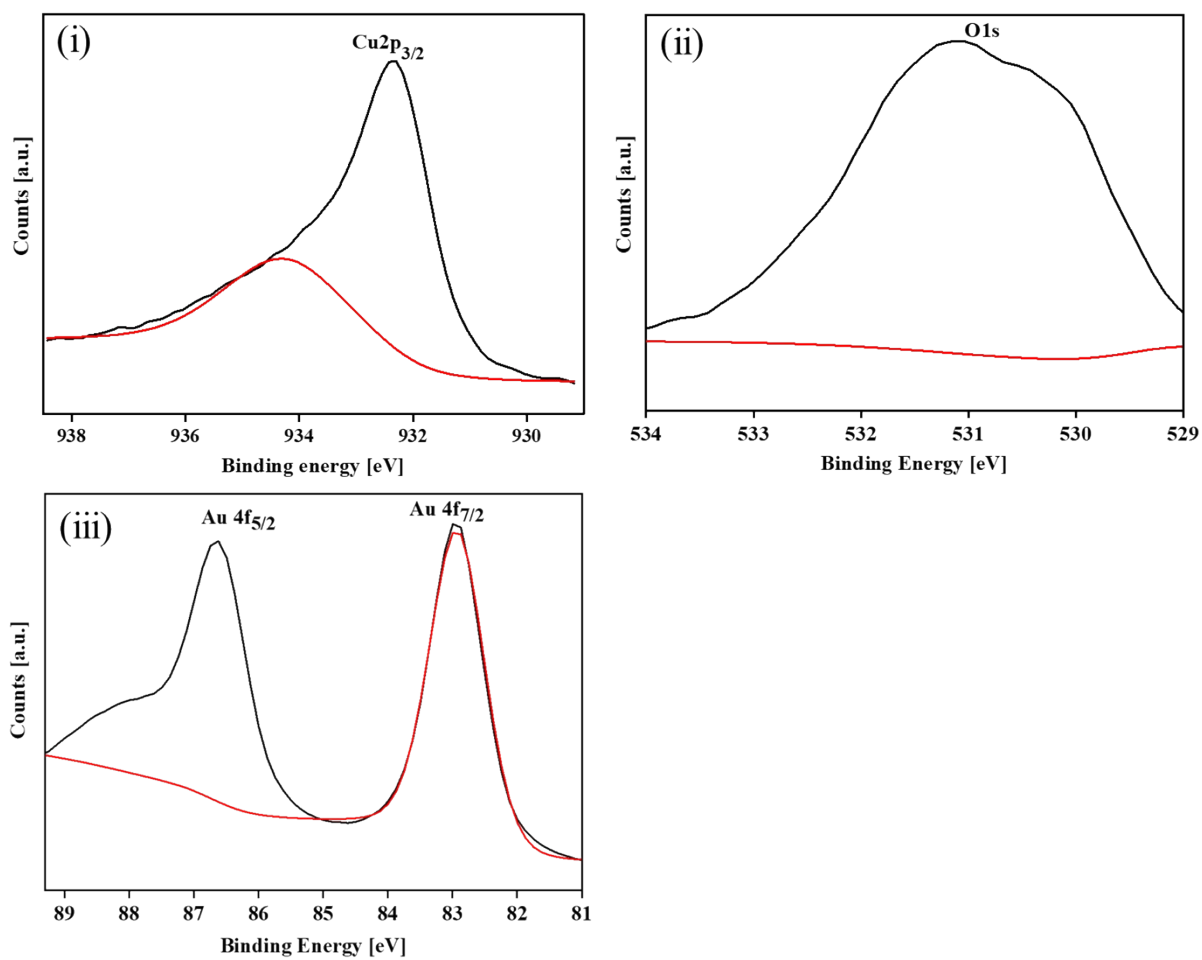

**Figure S2.** XPS analysis results indicating the peaks at (i) Cu<sub>2p</sub><sub>3/2</sub> (ii) O 1s and (iii) Au 4f of the core-shell Au/Cu<sub>2</sub>O composite.

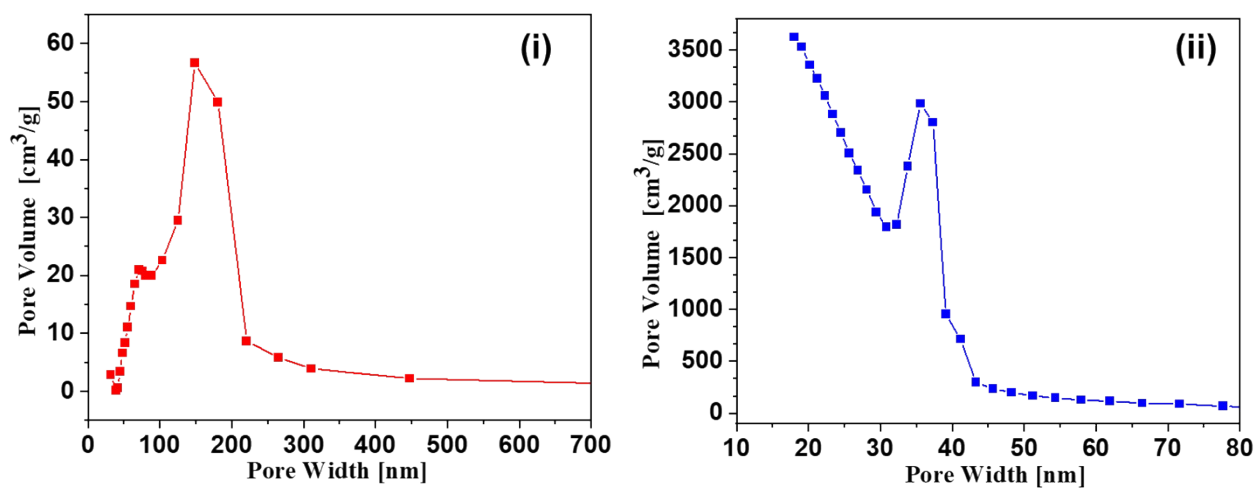

**Figure S3.** Pore size distribution analysis in the (a) Cu<sub>2</sub>O NCs and (b) Au/Cu<sub>2</sub>O composite.

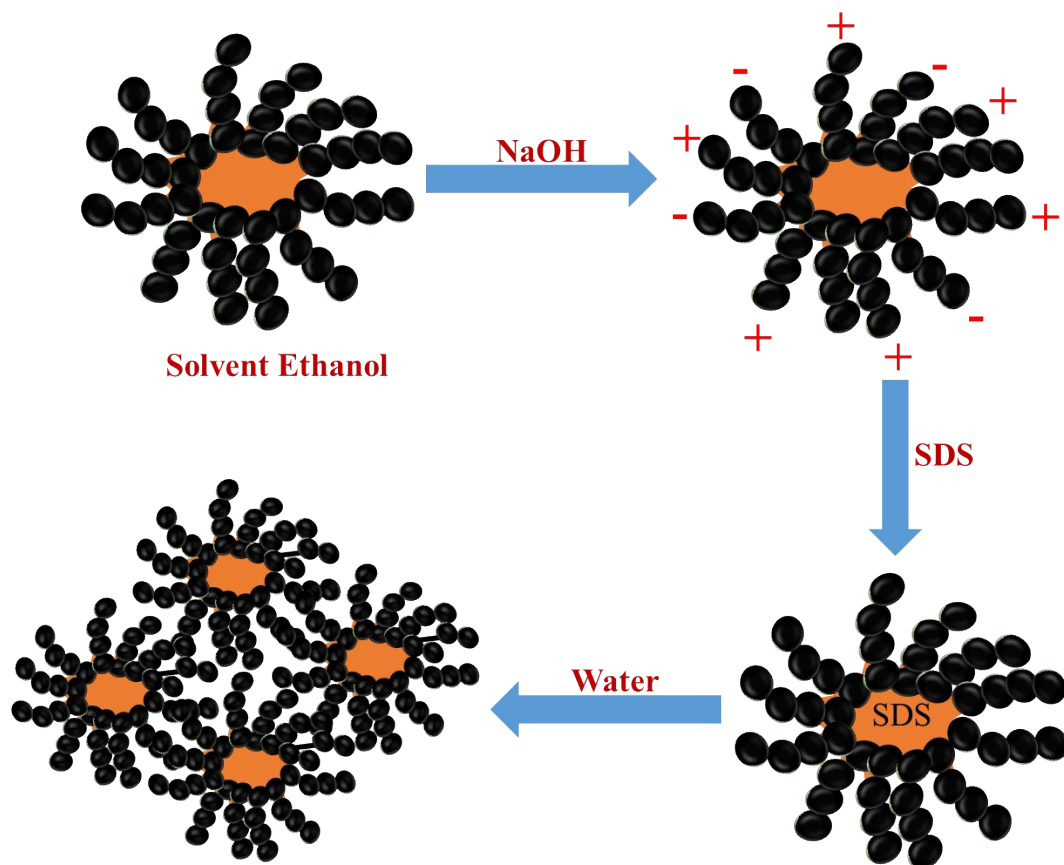

**Schematic 1.** Porosity expansion in the Au/Cu<sub>2</sub>O composite.

**Table S1.** Comparison among specific capacitances ( $C_s$ ) of reported electrodes at different electrolyte concentrations and current densities.

| Electrodes                                       | Electrolyte concentration | Specific capacitance    | Current density       | Ref.      |
|--------------------------------------------------|---------------------------|-------------------------|-----------------------|-----------|
| GrapheneCu <sub>2</sub> O@                       | 6 M KOH                   | 161 F·g <sup>-1</sup>   | 1 A·g <sup>-1</sup>   | 11        |
| Cu <sub>2</sub> O@MnO <sub>2</sub>               | 1 M KOH                   | 371 F·g <sup>-1</sup>   | 0.5 A·g <sup>-1</sup> | 17        |
| Cu <sub>2</sub> O/Co <sub>3</sub> O <sub>4</sub> | 1 M KOH                   | 1,096 F·g <sup>-1</sup> | 1 A·g <sup>-1</sup>   | 23        |
| Ag-Cu <sub>2</sub> O/RGO                         | 6 M KOH                   | 812 F·g <sup>-1</sup>   | 0.5 A·g <sup>-1</sup> | 28        |
| Cu <sub>2</sub> O@Ni-Al                          | 6 M KOH                   | 475 F·g <sup>-1</sup>   | 10 A·g <sup>-1</sup>  | 33        |
| Gr-Ag/PIn NCs                                    | 1 M KOH                   | 914 F·g <sup>-1</sup>   | 0.5 A·g <sup>-1</sup> | 37        |
| Au/Cu <sub>2</sub> O                             | 1 M KOH                   | 235 F·g <sup>-1</sup>   | 2 A·g <sup>-1</sup>   | This work |
